# Supplementary material for: Length of uninterrupted CAG repeats, independent of polyglutamine size, results in increased somatic instability and hastened age of onset in Huntington disease
Source: bioRxiv or medRxiv preprint supplement (doi:10.1101/533414), 2019-02-07
Supplement: Supplementary file [file media-1.pdf]

## SUPPLEMENTARY INFORMATION

### **Length of uninterrupted CAG repeats, independent of polyglutamine size, results in increased somatic instability and hastened age of onset in Huntington disease**

Galen E.B. Wright<sup>1</sup>; Jennifer A. Collins<sup>1</sup>; Chris Kay<sup>1</sup>; Cassandra McDonald<sup>1</sup>; Egor Dolzhenko<sup>2</sup>; Qingwen Xia<sup>1</sup>; Kristina Bečanović<sup>1,3</sup>; Alicia Semaka<sup>4</sup>; Charlotte M. Nguyen<sup>5,6</sup>; Brett Trost<sup>5</sup>; Fiona Richards<sup>7</sup>; Emilia K. Bijlsma<sup>8</sup>; Ferdinando Squitieri<sup>9</sup>; Stephen W. Scherer<sup>5,6,10</sup>; Michael A. Eberle<sup>2</sup>; Ryan K.C. Yuen<sup>5,6</sup>; Michael R. Hayden<sup>1\*</sup>

<sup>1</sup>Centre for Molecular Medicine Therapeutics, Department of Medical Genetics, University of British Columbia, Vancouver, BC, Canada; <sup>2</sup>Illumina Inc, San Diego, California, USA; <sup>3</sup>Department of Clinical Neuroscience, Karolinska Institutet, Stockholm, Sweden; <sup>4</sup>Department of Psychiatry, University of British Columbia, Vancouver, BC, Canada; <sup>5</sup>The Hospital For Sick Children, The Centre for Applied Genomics, Genetics and Genome Biology; <sup>6</sup>University of Toronto, Department of Molecular Genetics; <sup>7</sup>Department of Clinical Genetics, Children's Hospital at Westmead; <sup>8</sup>Department of Clinical Genetics, Leiden University Medical Center, Leiden, the Netherlands; <sup>9</sup>Huntington and Rare Diseases Unit, Fondazione IRCCS Casa Sollievo della Sofferenza, San Giovanni Rotondo, Italy; <sup>10</sup>McLaughlin Centre, University of Toronto.

**Supplementary Figure S1 HD loss of interruption (LOI) patient pedigrees included in the current study ( $n=6$ ).** Affection status, CAG sizes, age of onset information and LOI genotype are indicated

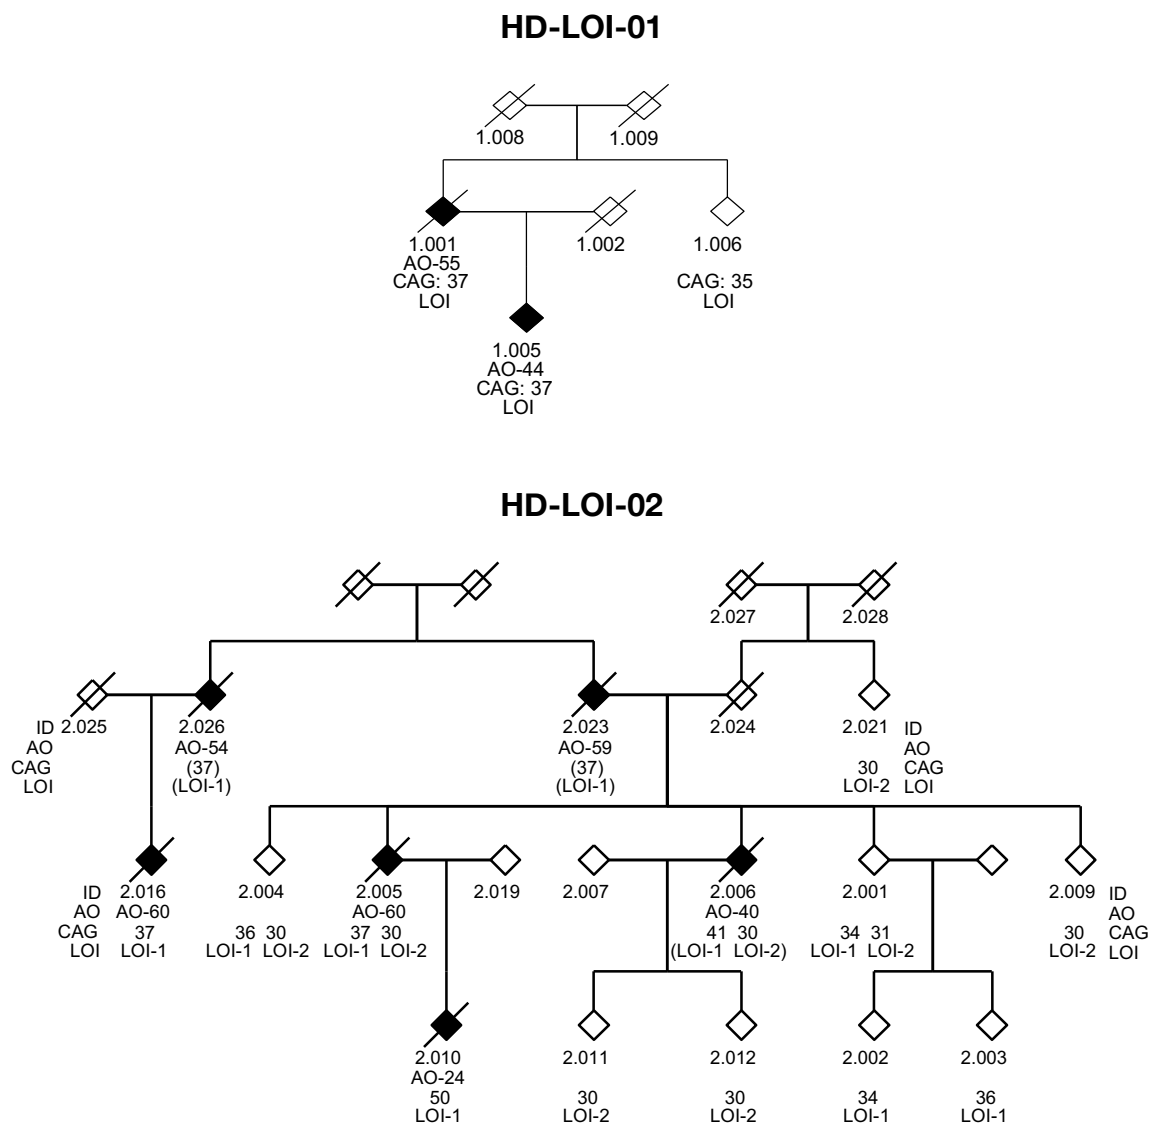

### HD-LOI-03

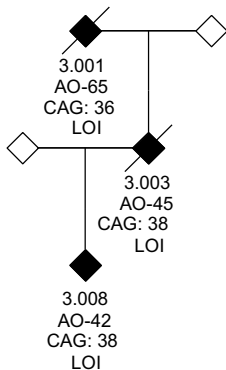

### HD-LOI-04

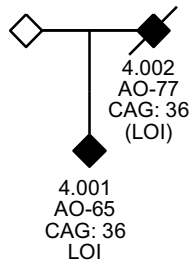

### HD-LOI-05

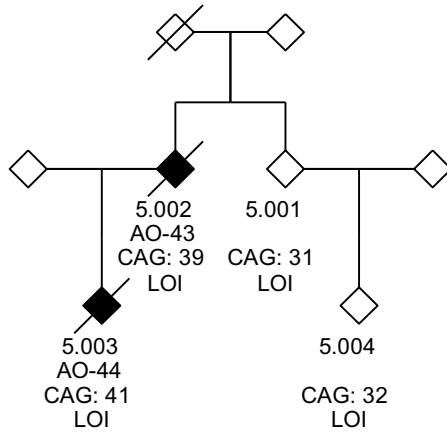

**HD-LOI-06**

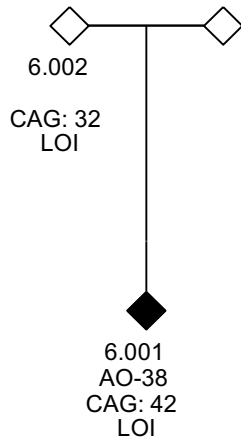

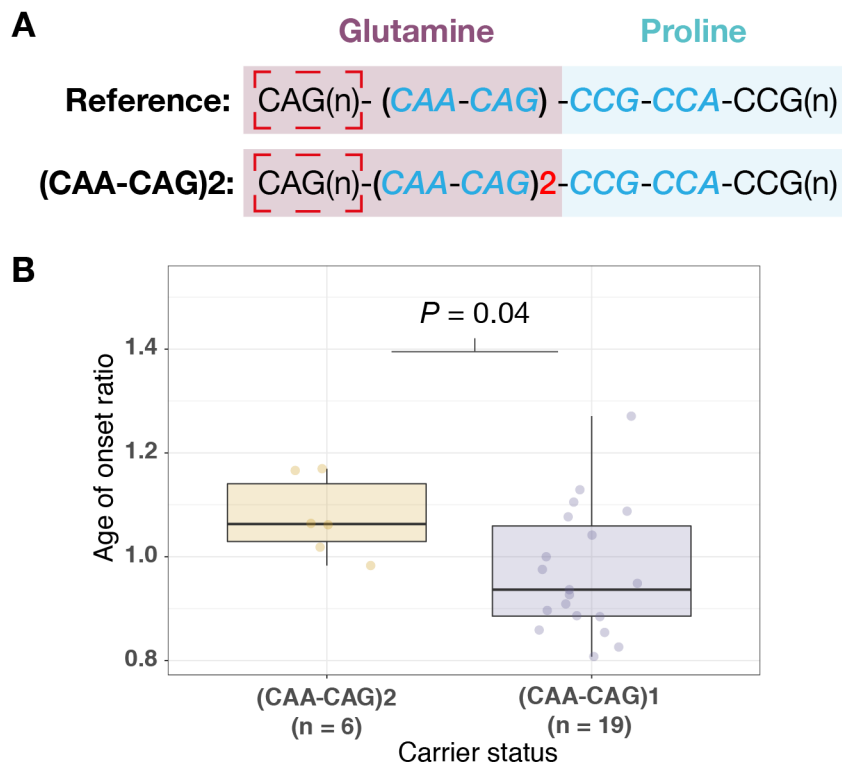

**Supplementary Figure S2. An interrupting sequence variant that results in an additional CAA-CAG repeat is associated with a later age of onset in HD patients. (A)** The reference *HTT* CAG-CCG interrupting sequence in relation to the (CAA-CAG)<sub>2</sub> variant. The dashed red box indicates the CAG repeat that is measured in diagnostic assays for HD. Nucleotides encoding the glutamine (i.e., CAG/CAA) and proline (i.e., CCG/CCA) tracts are shaded. **(B)** The (CAA-CAG)<sub>2</sub> variant is associated with later age of onset (AOO) as determined by the AOO ratio in HD subjects compared to HD subjects with the reference interrupting sequence ( $n=19$ ). (CAA-CAG)<sub>2</sub> carriers present on average 4.8 years later than the majority of HD patients with the reference CAG repeat interruption.
